# Supplementary material for: Ultrafast in-gel detection by fluorescent super-chelator probes with HisQuick-PAGE
Source: Springer Nature journal article supplement (doi:10.1038/s42003-020-0852-1), 2020-03-20
Supplement: MOESM2 [file 42003_2020_852_MOESM2_ESM.pdf]

## Supplemental Information

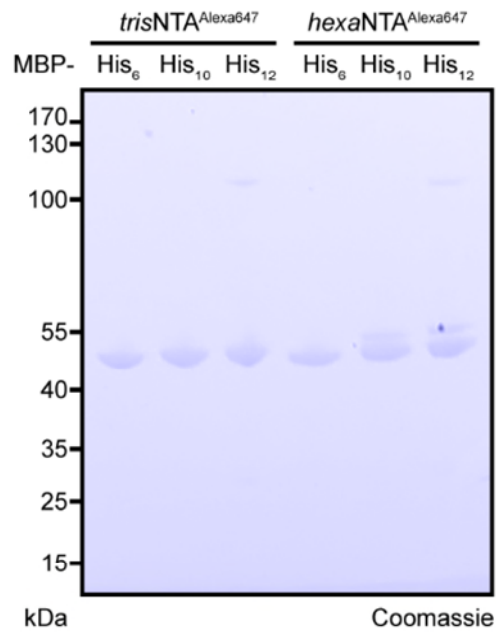

**Supplementary Figure 1 | Characterization of fluorescent chelator probes for SDS-PAGE protein detection.** Coomassie staining of non-reducing SDS-PAGE analysis of various sized histidine tags (His<sub>n</sub>) on 2 µg MBP (45 pmol) incubated with 450 nM (7 pmol) of *trisNTA*<sup>Alexa647</sup> or *hexaNTA*<sup>Alexa647</sup>. A slight upshift of the reference proteins MBP-His<sub>10,12</sub> is visible and confirming the labeling by *hexaNTA*<sup>Alexa647</sup> (Fig. 3a).

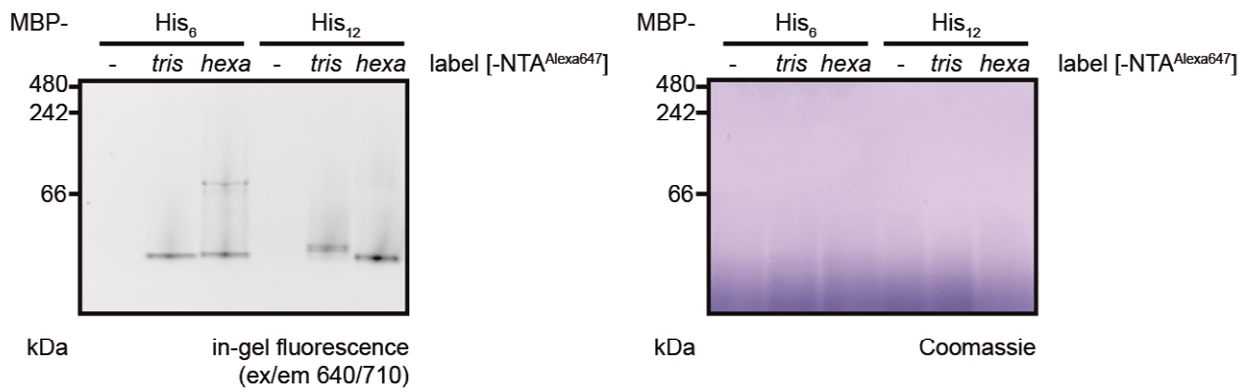

**Supplementary Figure 2 | Characterization of fluorescent chelator probes for blue native PAGE protein detection.** In-gel fluorescence and Coomassie staining of His<sub>6</sub>- and His<sub>12</sub>-tagged MBP (2 µg, 45 pmol) incubated with 450 nM (7 pmol) of *tris*NTA<sup>Alexa647</sup> or *hexa*NTA<sup>Alexa647</sup>.
